# Supplementary material for: Stable isotopic constraints on global soil organic carbon turnover
Source: Copernicus journal article supplement (doi:10.5194/bg-15-987-2018), 2018-02-20
Supplement: Supplementary file 1 [file bg-15-987-2018-supplement.zip]

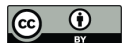

## *Supplement of*

# **Stable isotopic constraints on global soil organic carbon turnover**

**Chao Wang et al.**

*Correspondence to:* Edith Bai (baie@iae.ac.cn)

- [bg-15-987-2018-supplement-title-page.pdf](#)
- Supplementary
  - [Supplementary Materials.docx](#)
  - [Table S1- Database for  \$\delta^{13}C\$  analysis in this study..xlsx](#)

The copyright of individual parts of the supplement might differ from the CC BY 4.0 License.
